# Supplementary material for: Clots reveal anomalous elastic behavior of fiber networks
Source: PubMed Central journal article supplement — Sci Adv. 2024 Jan 10;10(2):eadh1265. doi: 10.1126/sciadv.adh1265 (PMC10780871; doi:10.1126/sciadv.adh1265), 2024-01-10
Supplement: sciadv.adh1265_sm.pdf [file sciadv.adh1265_sm.pdf]

Supplementary Materials for  
**Clots reveal anomalous elastic behavior of fiber networks**

*Andrei Zakharov et al.*

Corresponding author: Kinjal Dasbiswas, [kdasbiswas@ucmerced.edu](mailto:kdasbiswas@ucmerced.edu);  
Anand K. Ramasubramanian, [anand.ramasubramanian@sjsu.edu](mailto:anand.ramasubramanian@sjsu.edu)

*Sci. Adv.* **10**, eadh1265 (2024)  
DOI: 10.1126/sciadv.adh1265

**This PDF file includes:**

Figs. S1 to S6  
References

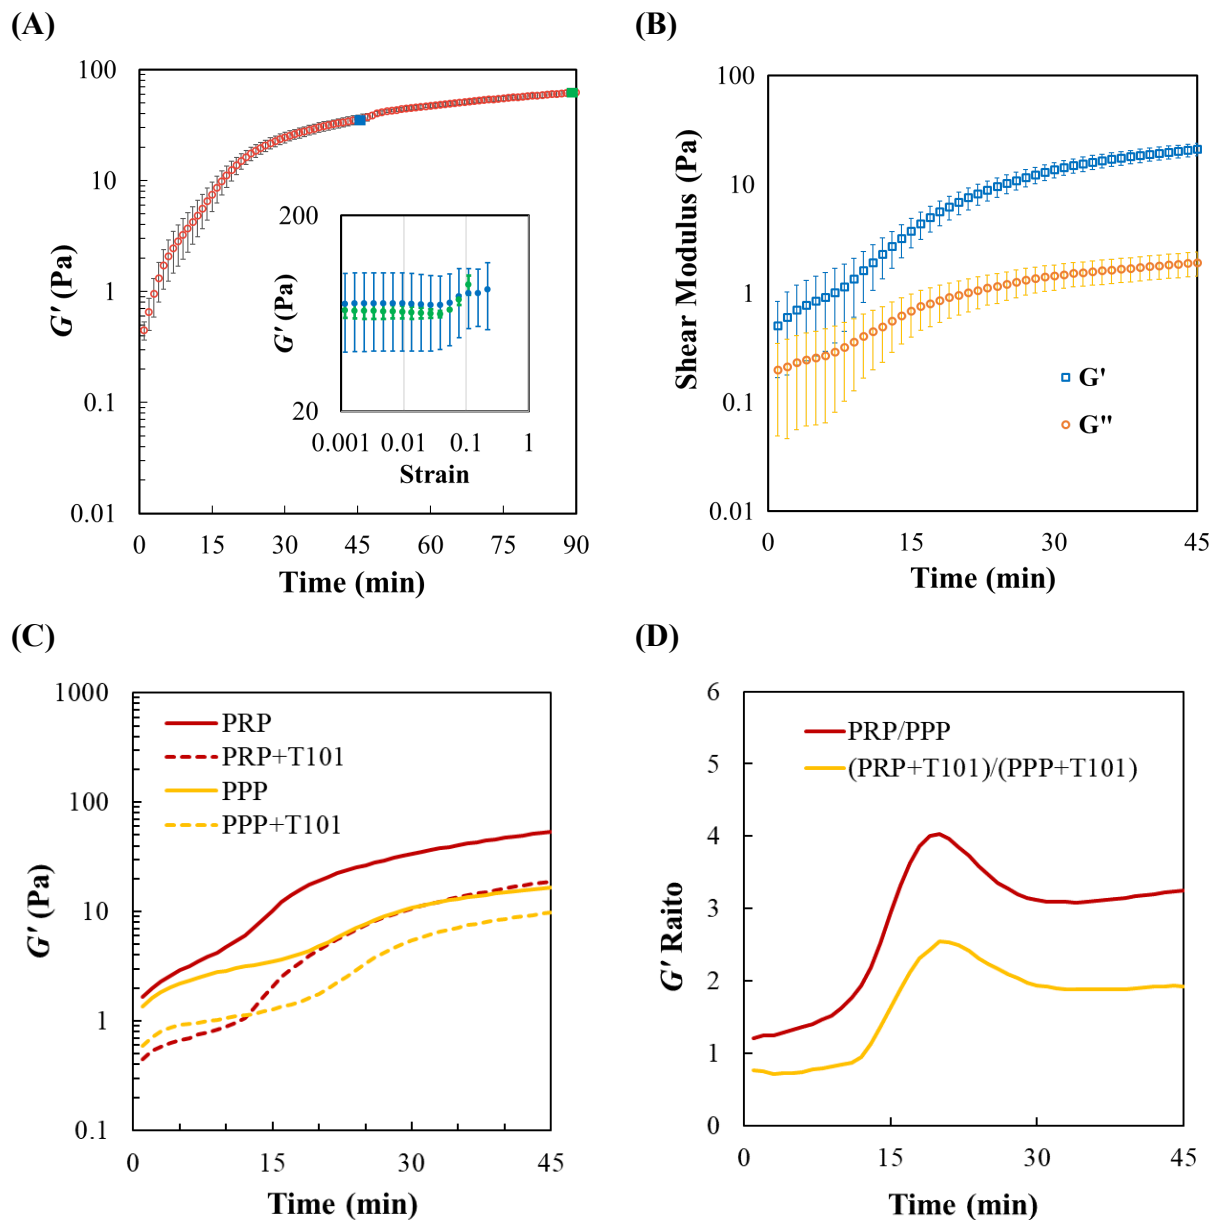

**Fig. S1. Gelation of PPP and PRP clots**

**(A) Representative gelation profile of platelet poor plasma (PPP).** The gelation plateaus by 45 min and increases slowly afterward. The response of the clots gelled for 45 min and 90 min (inset) were nearly identical (3 donors). **(B)** At 45 min,  $G''$  attains a saturation value that is more than one-log lower than  $G'$ , indicating complete gelation (5 donors). **(C)** Representative gelation profiles for platelet poor plasma (PPP) and platelet rich plasma (PRP) clots, showing elastic storage moduli ( $G'$ ) vs. time for clots prepared with and without T101 as a crosslinking inhibitor. **(D)** After ~30 min, the average relative increase in  $G'$  associated with the presence of platelets (i.e., ratio of PRP/PPP) was approximately threefold for crosslinked fibrin clots and approximately twofold for the uncrosslinked (T101-treated) case.

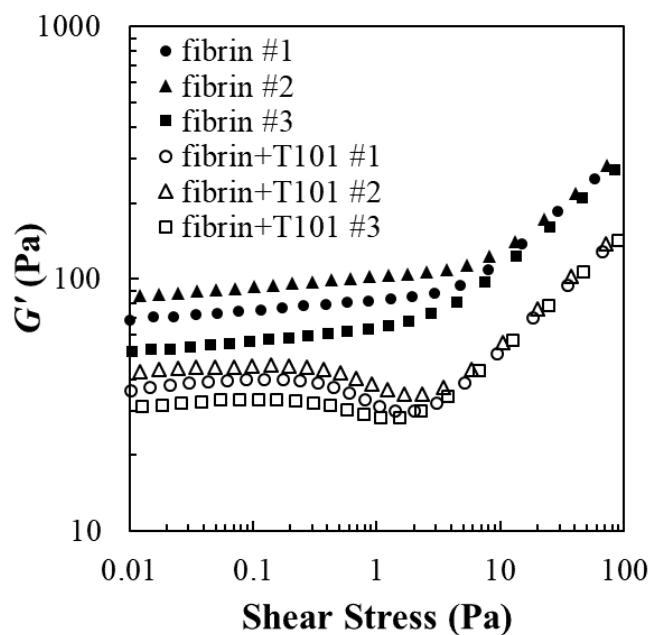

**Fig. S2. Shear rheology of pure fibrin networks**

Elastic storage modulus  $G'$  vs. shear stress for fibrin gels, comparing crosslinked and uncrosslinked fibrin, showing  $n = 3$  identically prepared replicates for each case. Fibrin gels were formed using 3 mg/mL fibrinogen with 1 U/mL thrombin and 20 mM  $\text{CaCl}_2$ . For the uncrosslinked gels, 100  $\mu\text{M}$  T101 was added as an inhibitor. Both types of fibrin gels are stress-stiffening. However the uncrosslinked case exhibits a dip near 1 Pa, which is similar to the model-predicted behavior and T101-treated PPP data in the main text (**Fig. 2**).

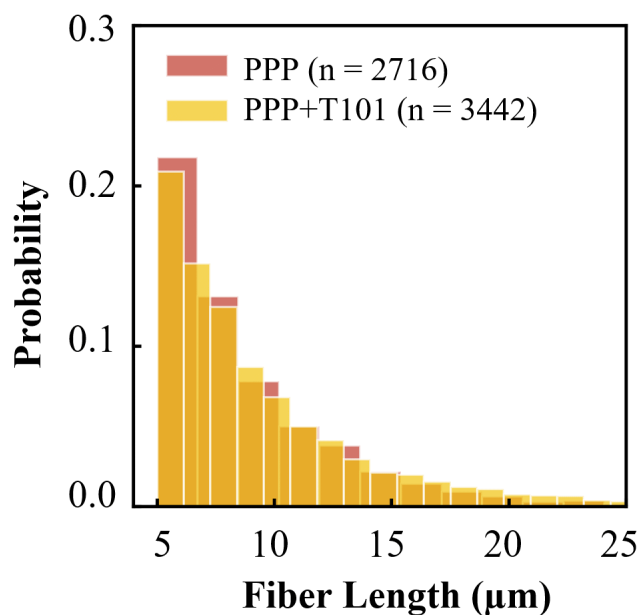

**Fig. S3. Distribution of fiber lengths in crosslinked and uncrosslinked PPP clots.**

Fiber lengths for PPP clots with and without T101 were determined from a set of fluorescence microscopy images at equal magnification (3 images for each case). A threshold of 5  $\mu\text{m}$  was used to filter artifactually short segments and image fragments. The histograms reveal that there is no substantial difference in the distribution of fiber lengths between crosslinked and uncrosslinked fibrin.

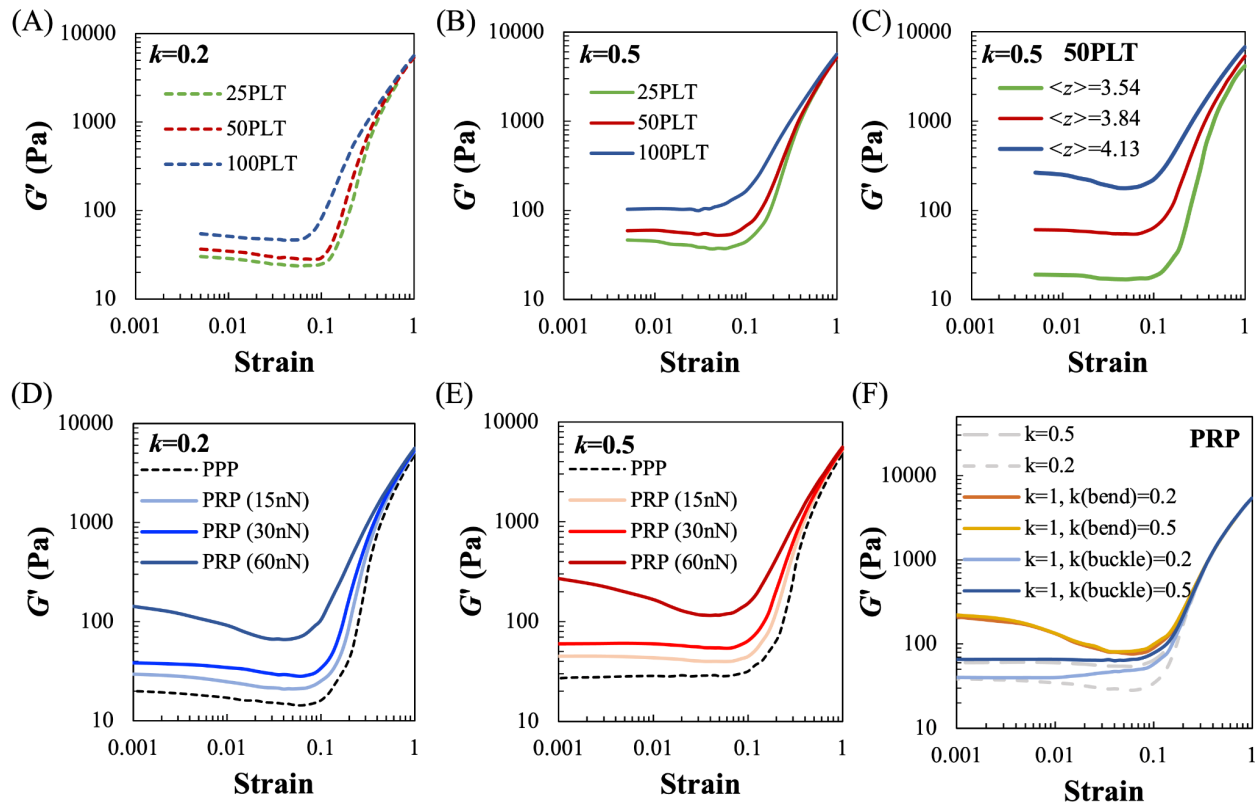

**Fig. S4. Effect of number of platelet aggregates, connectivity, platelet force and fiber stiffness on the response of active networks.**

The critical strain at which stiffening transition takes place strongly depends on the number of platelets. Simulations reveal that increasing platelet density leads to lowering critical strain in both uncrosslinked (A) and crosslinked (B) clots. Contracting platelet aggregates pull out available soft bending and buckling modes, and thus the transition to the stiff stretching dominated mode occurs at smaller strains. Platelet aggregates prestress the network and create additional buckling, which results in softening of the network, and this effect is more pronounced in uncrosslinked clots at lower  $k$ , or in over-coordinated networks at larger  $\langle z \rangle$  (C), because bending is limited in networks at larger  $\langle z \rangle$  and platelet aggregates cause more fibers to buckle. Increasing platelet contractile force stiffen the network in a non-linear manner (D, E). Reducing exclusively bending or buckling stiffness (F) shows that platelets stiffen the networks with smaller bending resistance at small strains (orange and red lines in (F)). Since bending is energetically cheaper (easy to change the angle between fibers at branch points), platelets can efficiently form force chains without fiber buckling, along which the network is reinforced. With strain, buckling becomes unavoidable, this results in network softening until transition to stiff stretching mode. Platelets in networks with rigid branch points (blue and light blue lines in (F)), conversely, pull out available energetically cheap buckling modes and demonstrate only bending dominated regime (the plateau in  $G'$ ). Since bending is energetically unfavorable, platelets deform the network more uniformly and at small ranges, and thus the network is weakly stiffened by platelets.

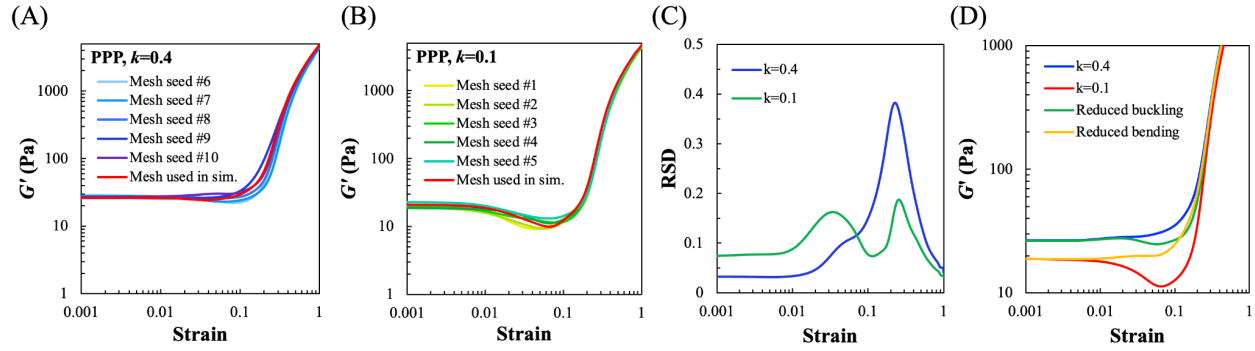

**Fig. S5. Statistical validation of the numerical model and decoupling bending and buckling stiffness.**

(A-C) Dependence of shear modulus ( $G'$ ) on shear strain in PPP clots of different mesh seeding at constant average coordination number ( $\langle z \rangle = 3.84$ ). Different curves correspond to different randomly generated networks in both crosslinked ( $k = 0.4$ , panel A) and uncrosslinked ( $k = 0.1$ , panel B) clots. The results for the mesh used in simulations presented in the main text are colored in red. (C) Relative standard deviation (RSD) for crosslinked ( $k = 0.4$ ) and uncrosslinked ( $k = 0.1$ ) clots is increased at strains of large softening and stiffening, and appears only due to a slight shift in the softening/stiffening transitions between different mesh seeds. (D) Reducing exclusively bending stiffness of fibrin fibers (from  $k_{bend} = 0.4$  to  $k_{bend} = 0.1$ ) does not lead to appearance of softening dip, whereas reduced buckling stiffness (from  $k_{buckle} = 0.4$  to  $k_{buckle} = 0.1$ ) causes a small narrow region of decreased  $G'$ . The combined effect of reduced buckling and bending stiffness not only increases the magnitude of the dip but also makes it wider.

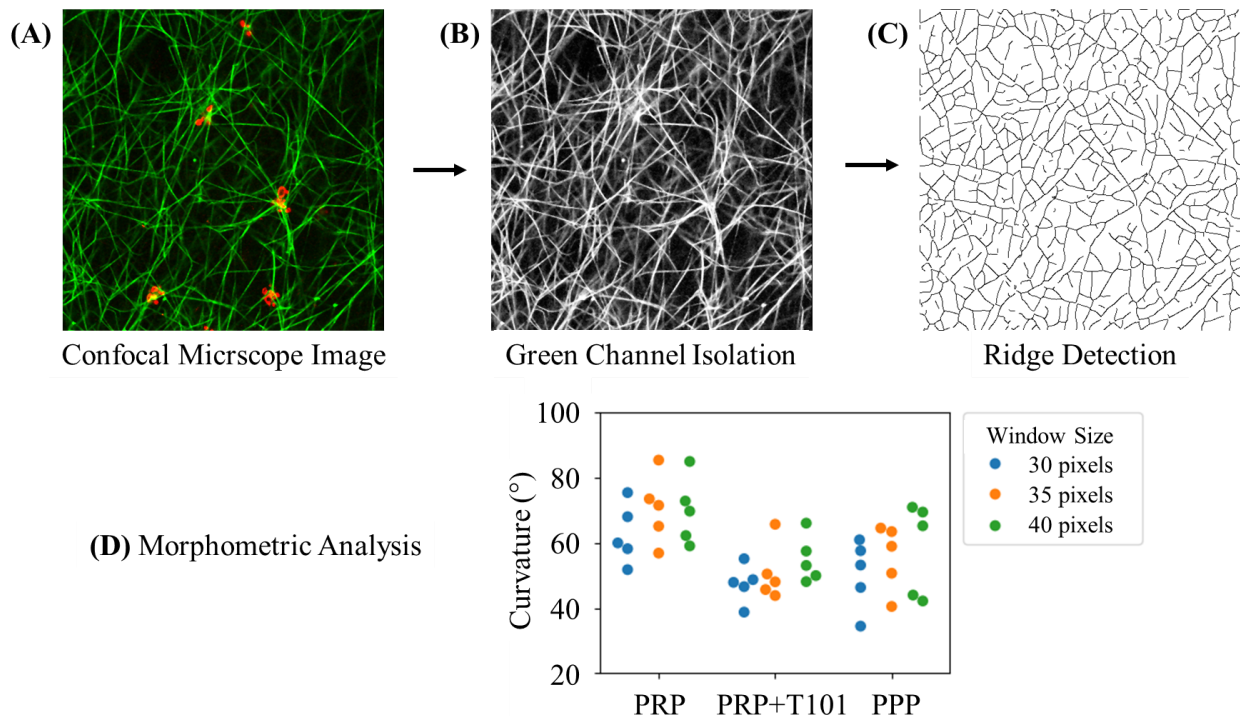

**Fig. S6. Curvature analysis of fibers in PRP clots.**

Confocal fluorescence microscope images (A) of PRP, PRP+T101, and PPP clots ( $n = 5$  images for each) were compared using the TWOMBLI macro for ImageJ, whereby curvature is defined as "the mean change in angle moving incrementally along individual mask fibres by user-specified windows" (59). The green channel was isolated to examine fibrin without platelets (B). The Ridge Detection plugin (97) was used for identifying fibers (C), with pre-calibration as guided within TWOMBLI. Different combinations of parameter values were screened, and the combination of 10 pixels for line width and 5 pixels for minimum branch length produced networks that were most visually consistent with the density and coordination number seen in the network model. Curvature windows of 30, 35, and 40 pixels were examined. Although there is some sensitivity to the particular choice of curvature window (D), morphometric analysis using AnaMorf (98), integrated within TWOMBLI, showed that curvature is characteristically higher for PRP than for PRP+T101 and PPP. Using the 35-pixel window size as representative, PRP had an average curvature value of  $70.5^\circ \pm 10.6^\circ$  (mean  $\pm$  standard deviation), compared to  $50.8^\circ \pm 8.73^\circ$  for PRP+T101 and  $55.6^\circ \pm 10.1^\circ$  for PPP. These experimental observations are consistent with model behavior, whereby applied strain induces buckling within the network (Fig. 3A) and a higher occurrence of buckled bonds is expected for crosslinked networks (Fig. 4C).

## REFERENCES

1. J. W. Weisel, R. I. Litvinov, Fibrin formation, structure and properties, in *Fibrous Proteins: Structures and Mechanisms*, D. A. D. Parry, J. M. Squire, Eds. (Springer International Publishing, 2017), pp. 405–456.
2. F. Burla, Y. Mulla, B. E. Vos, A. Aufderhorst-Roberts, G. H. Koenderink, From mechanical resilience to active material properties in biopolymer networks. *Nat. Rev. Phys.* **1**, 249–263 (2019).
3. T. A. E. Ahmed, E. V. Dare, M. Hincke, Fibrin: A versatile scaffold for tissue engineering applications. *Tissue Eng. Part B Rev.* **14**, 199–215 (2008).
4. S. Kattula, J. R. Byrnes, A. S. Wolberg, Fibrinogen and fibrin in hemostasis and thrombosis. *Arterioscler. Thromb. Vasc. Biol.* **37**, e13–e21 (2017).
5. S. J. Pathare, W. Eng, S.-J. J. Lee, A. K. Ramasubramanian, Fibrin prestress due to platelet aggregation and contraction increases clot stiffness. *Biophys. Rep. (N Y)* **1**, 100022 (2021).
6. K. C. Gersh, C. Nagaswami, J. W. Weisel, Fibrin network structure and clot mechanical properties are altered by incorporation of erythrocytes. *Thromb. Haemost.* **102**, 1169–1175 (2009).
7. J.-P. Collet, H. Shuman, R. E. Ledger, S. Lee, J. W. Weisel, The elasticity of an individual fibrin fiber in a clot. *Proc. Natl. Acad. Sci. U.S.A.* **102**, 9133–9137 (2005).
8. T. Feller, S. D. A. Connell, R. A. S. Ariëns, Why fibrin biomechanical properties matter for hemostasis and thrombosis. *J. Thromb. Haemost.* **20**, 6–16 (2022).
9. M. A. Kotlarchyk, S. G. Shreim, M. B. Alvarez-Elizondo, L. C. Estrada, R. Singh, L. Valdevit, E. Kniazeva, E. Gratton, A. J. Putnam, E. L. Botvinick, Concentration independent modulation of local micromechanics in a fibrin gel. *PLOS ONE* **6**, e20201 (2011).
10. I. K. Piechocka, R. G. Bacabac, M. Potters, F. C. Mackintosh, G. H. Koenderink, Structural hierarchy governs fibrin gel mechanics. *Biophys. J.* **98**, 2281–2289 (2010).
11. O. V. Kim, R. I. Litvinov, J. W. Weisel, M. S. Alber, Structural basis for the nonlinear mechanics of



- fibrin networks under compression. *Biomaterials* **35**, 6739–6749 (2014).
12. N. Filla, Y. Zhao, X. Wang, Fibrin fiber deformation mechanisms: Insights from phenomenological modeling to molecular details. *Biomech. Model. Mechanobiol.* **22**, 851–869 (2023).
  13. W. Liu, C. R. Carlisle, E. A. Sparks, M. Guthold, The mechanical properties of single fibrin fibers. *J. Thromb. Haemost.* **8**, 1030–1036 (2010).
  14. E. A. Ryan, L. F. Mockros, A. M. Stern, L. Lorand, Influence of a natural and a synthetic inhibitor of factor XIIIa on fibrin clot rheology. *Biophys. J.* **77**, 2827–2836 (1999).
  15. E. L. Hethershaw, A. L. Cilia La Corte, C. Duval, M. Ali, P. J. Grant, R. A. S. Ariëns, H. Philippou, The effect of blood coagulation factor XIII on fibrin clot structure and fibrinolysis. *J. Thromb. Haemost.* **12**, 197–205 (2014).
  16. D. C. Rijken, S. Abdul, J. J. M. C. Malfliet, F. W. G. Leebeek, S. Uitte de Willige, Compaction of fibrin clots reveals the antifibrinolytic effect of factor XIII. *J. Thromb. Haemost.* **14**, 1453–1461 (2016).
  17. F. Pancaldi, O. V. Kim, J. W. Weisel, M. Alber, Z. Xu, Computational biomechanical modeling of fibrin networks and platelet-fiber network interactions. *Curr. Opin. Biomed. Eng.* **22**, 100369 (2022).
  18. T. H. S. van Kempen, W. P. Donders, F. N. van de Vosse, G. W. M. Peters, A constitutive model for developing blood clots with various compositions and their nonlinear viscoelastic behavior. *Biomech. Model. Mechanobiol.* **15**, 279–291 (2016).
  19. A. S. G. van Oosten, X. Chen, L. Chin, K. Cruz, A. E. Patteson, K. Pogoda, V. B. Shenoy, P. A. Janmey, Emergence of tissue-like mechanics from fibrous networks confined by close-packed cells. *Nature* **573**, 96–101 (2019).
  20. F. Ghezlbash, S. Liu, A. Shirazi-Adl, J. Li, Blood clot behaves as a poro-visco-elastic material. *J. Mech. Behav. Biomed. Mater.* **128**, 105101 (2022).
  21. B. Fereidoonzhad, P. McGarry, A new constitutive model for permanent deformation of blood

- clots with application to simulation of aspiration thrombectomy. *J. Biomech.* **130**, 110865 (2021).
22. C. Storm, J. J. Pastore, F. C. MacKintosh, T. C. Lubensky, P. A. Janmey, Nonlinear elasticity in biological gels. *Nature* **435**, 191–194 (2005).
23. N. Takeishi, T. Shigematsu, R. Enosaki, S. Ishida, S. Ii, S. Wada, Development of a mesoscopic framework spanning nanoscale protofibril dynamics to macro-scale fibrin clot formation. *J. R. Soc. Interface* **18**, 20210554 (2021).
24. S. Yesudasan, X. Wang, R. D. Averett, Fibrin polymerization simulation using a reactive dissipative particle dynamics method. *Biomech. Model. Mechanobiol.* **17**, 1389–1403 (2018).
25. A. Zhmurov, O. Kononova, R. I. Litvinov, R. I. Dima, V. Barsegov, J. W. Weisel, Mechanical transition from  $\alpha$ -helical coiled coils to  $\beta$ -sheets in fibrin(ogen). *J. Am. Chem. Soc.* **134**, 20396–20402 (2012).
26. A. Mann, R. S. Sopher, S. Goren, O. Shelah, O. Tchaicheyan, A. Lesman, Force chains in cell-cell mechanical communication. *J. R. Soc. Interface* **16**, 20190348 (2019).
27. M. Sarkar, J. Notbohm, Evolution of force chains explains the onset of strain stiffening in fiber networks. *J. Appl. Mech.* **89**, 11 (2022).
28. P. M. Nair, M. A. Meledeo, A. R. Wells, X. Wu, J. A. Bynum, K. P. Leung, B. Liu, A. Cheeniyil, A. K. Ramasubramanian, J. W. Weisel, A. P. Cap, Cold-stored platelets have better preserved contractile function in comparison with room temperature-stored platelets over 21 days. *Transfusion* **61**, Suppl. 1 S68–S79 (2021).
29. Y. Sun, O. Oshinowo, D. R. Myers, W. A. Lam, A. Alexeev, Resolving the missing link between single platelet force and clot contractile force. *iScience* **25**, 103690 (2021).
30. M. A. Pantelev, N. Korin, K. D. Reesink, D. L. Bark, J. M. E. M. Cosemans, E. E. Gardiner, P. H. Mangin, Wall shear rates in human and mouse arteries: Standardization of hemodynamics for in vitro blood flow assays: Communication from the ISTH SSC subcommittee on biorheology. *J. Thromb. Haemost.* **19**, 588–595 (2021).

31. A. Sharma, A. J. Licup, K. A. Jansen, R. Rens, M. Sheinman, G. H. Koenderink, F. C. MacKintosh, Strain-controlled criticality governs the nonlinear mechanics of fibre networks. *Nat. Phys.***12**, 584–587 (2016).
32. J. C. Maxwell, On the calculation of the equilibrium and stiffness of frames. *Philos. Mag.***27**, 294–299 (1864).
33. J. C. Maxwell, XLV. On reciprocal figures and diagrams of forces. *Lond. Edinb. Dublin Philos. Mag. J. Sci.* **27**, 250–261 (1864).
34. C. P. Broedersz, X. Mao, T. C. Lubensky, F. C. MacKintosh, Criticality and isostaticity in fibre networks. *Nat. Phys.* **7**, 983–988 (2011).
35. M. Das, D. A. Quint, J. M. Schwarz, Redundancy and cooperativity in the mechanics of compositely crosslinked filamentous networks. *PLOS ONE* **7**, e35939 (2012).
36. L. D. Landau, L. P. Pitaevskii, Kosevich A M, Lifshitz E, *Theory of Elasticity* (Elsevier, 1984), vol. 7.
37. C. Heussinger, E. Frey, Floppy modes and nonaffine deformations in random fiber networks. *Phys. Rev. Lett.***97**, 105501 (2006).
38. P. R. Onck, T. Koeman, T. van Dillen, E. van der Giessen, Alternative explanation of stiffening in cross-linked semiflexible networks. *Phys. Rev. Lett.***95**, 178102 (2005).
39. T. Y. Foong, Y. Hua, R. Amini, I. A. Sigal, Who bears the load? IOP-induced collagen fiber recruitment over the corneoscleral shell. *Exp. Eye Res.***230**, 109446 (2023).
40. E. Lerner, E. Bouchbinder, Anomalous linear elasticity of disordered networks. *Soft Matter* **19**, 1076–1080 (2023).
41. S. Wang, Y. Hu, T. B. Kouznetsova, L. Sapir, D. Chen, A. Herzog-Arbeitman, J. A. Johnson, M. Rubinstein, S. L. Craig, Facile mechanochemical cycloreversion of polymer cross-linkers enhances tear resistance. *Science* **380**, 1248–1252 (2023).

42. J. L. Shivers, J. Feng, A. S. G. van Oosten, H. Levine, P. A. Janmey, F. C. MacKintosh, Compression stiffening of fibrous networks with stiff inclusions. *Proc. Natl. Acad. Sci. U. S. A.* **117**, 21037–21044 (2020).
43. K. F. Freund, K. P. Doshi, S. L. Gaul, D. A. Claremon, D. C. Remy, J. J. Baldwin, S. M. Pitzengerger, A. M. Stern, Transglutaminase inhibition by 2-[(2-oxopropyl)thio]imidazolium derivatives: Mechanism of factor XIIIa inactivation. *Biochemistry* **33**, 10109–10119 (1994).
44. M. Bathe, C. Heussinger, M. M. A. E. Claessens, A. R. Bausch, E. Frey, Cytoskeletal bundle mechanics. *Biophys. J.* **94**, 2955–2964 (2008).
45. S. Timoshenko, *Theory of Elastic Stability* (Tata McGraw-Hill Education, ed. 2, 1963).
46. S. Britton, O. Kim, F. Pancaldi, Z. Xu, R. I. Litvinov, J. W. Weisel, M. Alber, Contribution of nascent cohesive fiber-fiber interactions to the non-linear elasticity of fibrin networks under tensile load. *Acta Biomater.* **94**, 514–523 (2019).
47. J. Xia, L.-H. Cai, H. Wu, F. C. MacKintosh, D. A. Weitz, Anomalous mechanics of  $Zn^{2+}$ -modified fibrin networks. *Proc. Natl. Acad. Sci. U. S. A.* **118**, e2020541118 (2021).
48. C. P. Broedersz, F. C. MacKintosh, Molecular motors stiffen non-affine semiflexible polymer networks. *Soft Matter*. **7**, 3186–3191 (2011).
49. A. Sharma, A. J. Licup, R. Rens, M. Vahabi, K. A. Jansen, G. H. Koenderink, F. C. MacKintosh, Strain-driven criticality underlies nonlinear mechanics of fibrous networks. *Phys. Rev. E* **94**, 042407 (2016).
50. S. Münster, L. M. Jawerth, B. A. Leslie, J. I. Weitz, B. Fabry, D. A. Weitz, Strain history dependence of the nonlinear stress response of fibrin and collagen networks. *Proc. Natl. Acad. Sci. U.S.A.* **110**, 12197–12202 (2013).
51. J. Feng, H. Levine, X. Mao, L. M. Sander, Nonlinear elasticity of disordered fiber networks. *Soft Matter* **12**, 1419–1424 (2016).

52. E. Conti, F. C. Mackintosh, Cross-linked networks of stiff filaments exhibit negative normal stress. *Phys. Rev. Lett.* **102**, 088102 (2009).
53. M. Bouzid, E. Del Gado, Network topology in soft gels: Hardening and softening materials. *Langmuir* **34**, 773–781 (2018).
54. Y. Zhang, Y. Qiu, A. T. Blanchard, Y. Chang, J. M. Brockman, V. P.-Y. Ma, W. A. Lam, K. Salaita, Platelet integrins exhibit anisotropic mechanosensing and harness piconewton forces to mediate platelet aggregation. *Proc. Natl. Acad. Sci. U.S.A.* **115**, 325–330 (2018).
55. J. Hanke, D. Probst, A. Zemel, U. S. Schwarz, S. Köster, Dynamics of force generation by spreading platelets. *Soft Matter* **14**, 6571–6581 (2018).
56. W. A. Lam, O. Chaudhuri, A. Crow, K. D. Webster, T.-D. Li, A. Kita, J. Huang, D. A. Fletcher, Mechanics and contraction dynamics of single platelets and implications for clot stiffening. *Nat. Mater.* **10**, 61–66 (2011).
57. K. F. Standeven, A. M. Carter, P. J. Grant, J. W. Weisel, I. Chernysh, L. Masova, S. T. Lord, R. A. S. Ariëns, Functional analysis of fibrin  $\gamma$ -chain cross-linking by activated factor XIII: Determination of a cross-linking pattern that maximizes clot stiffness. *Blood* **110**, 902–907 (2007).
58. C. Duval, P. Allan, S. D. A. Connell, V. C. Ridger, H. Philippou, R. A. S. Ariëns, Roles of fibrin  $\alpha$ - and  $\gamma$ -chain specific cross-linking by FXIIIa in fibrin structure and function. *Thromb. Haemost.* **111**, 842–850 (2014).
59. E. Wershof, D. Park, D. J. Barry, R. P. Jenkins, A. Rullan, A. Wilkins, K. Schlegelmilch, I. Roxanis, K. I. Anderson, P. A. Bates, E. Sahai, A FIJI macro for quantifying pattern in extracellular matrix. *Life Sci Alliance* **4**, e202000880 (2021).
60. Y. Qiu, A. C. Brown, D. R. Myers, Y. Sakurai, R. G. Mannino, R. Tran, B. Ahn, E. T. Hardy, M. F. Kee, S. Kumar, G. Bao, T. H. Barker, W. A. Lam, Platelet mechanosensing of substrate stiffness during clot formation mediates adhesion, spreading, and activation *Proc. Natl. Acad. Sci. U.S.A.* **111**, 14430–14435 (2014).

61. S. Kumar, Y. Wang, M. Hedayati, F. Fleissner, M. K. Rausch, S. H. Parekh, Structural control of fibrin bioactivity by mechanical deformation. *Proc. Natl. Acad. Sci. U.S.A.* **119**, e2117675119 (2022).
62. P. A. Janmey, J. P. Winer, J. W. Weisel, Fibrin gels and their clinical and bioengineering applications. *J. R. Soc. Interface* **6**, 1–10 (2009).
63. J. V. Shah, P. A. Janmey, Strain hardening of fibrin gels and plasma clots. *Rheola Acta* **36**, 262–268 (1997).
64. N. A. Kurniawan, J. Grimbergen, J. Koopman, G. H. Koenderink, Factor XIII stiffens fibrin clots by causing fiber compaction. *J. Thromb. Haemost.* **12**, 1687–1696 (2014).
65. A. Kabla, L. Mahadevan, Nonlinear mechanics of soft fibrous networks. *J. R. Soc. Interface* **4**, 99–106 (2007).
66. F. Meng, E. M. Terentjev, Theory of semiflexible filaments and networks. *Polymers (Basel)* **9**, 52 (2017).
67. M. L. Gardel, J. H. Shin, F. C. MacKintosh, L. Mahadevan, P. Matsudaira, D. A. Weitz, Elastic behavior of cross-linked and bundled actin networks. *Science* **304**, 1301–1305 (2004).
68. R. C. Picu, Mechanics of random fiber networks—A review. *Soft Matter* **7**, 6768–6785 (2011).
69. D. Song, A. A. Oberai, P. A. Janmey, Hyperelastic continuum models for isotropic athermal fibrous networks. *Interface Focus* **12**, 20220043 (2022).
70. C. P. Broedersz, F. C. MacKintosh, Modeling semiflexible polymer networks. *Rev. Mod. Phys.* **86**, 995–1036 (2014).
71. M. Das, F. C. MacKintosh, A. J. Levine, Effective medium theory of semiflexible filamentous networks. *Phys. Rev. Lett.* **99**, 038101 (2007).
72. S. Chen, T. Markovich, F. C. MacKintosh, Nonaffine deformation of semiflexible polymer and fiber networks. *Phys. Rev. Lett.* **130**, 088101 (2023).

73. F. Maksudov, A. Daraei, A. Sessa, K. A. Marx, M. Guthold, V. Barsegov, Strength, deformability and toughness of uncrosslinked fibrin fibers from theoretical reconstruction of stress-strain curves. *Acta Biomater.* **136**, 327–342 (2021).
74. X. Liang, I. Chernysh, P. K. Purohit, J. W. Weisel, Phase transitions during compression and decompression of clots from platelet-poor plasma, platelet-rich plasma and whole blood. *Acta Biomater.* **60**, 275–290 (2017).
75. U. Windberger, V. Glanz, L. Ploszczanski, Laboratory rat thrombi lose one-third of their Stiffness when exposed to large oscillating shear stress amplitudes: Contrasting behavior to human clots. *Int. J. Transl. Med.* **2**, 332–344 (2022).
76. S.-J. J. Lee, D. M. Nguyen, H. S. Grewal, C. Puligundla, A. K. Saha, P. M. Nair, A. P. Cap, A. K. Ramasubramanian, Image-based analysis and simulation of the effect of platelet storage temperature on clot mechanics under uniaxial strain. *Biomech. Model. Mechanobiol.* **19**, 173–187 (2020).
77. M. Alzweighi, R. Mansour, J. Lahti, U. Hirn, A. Kulachenko, The influence of structural variations on the constitutive response and strain variations in thin fibrous materials. *Acta Mater.* **203**, 116460 (2021).
78. C. Heussinger, E. Frey, Force distributions and force chains in random stiff fiber networks. *Eur. Phys. J. E Soft Matter* **24**, 47–53 (2007).
79. M. S. Rudnicki, H. A. Cirka, M. Aghvami, E. A. Sander, Q. Wen, K. L. Billiar, Nonlinear strain stiffening is not sufficient to explain how far cells can feel on fibrous protein gels. *Biophys. J.* **105**, 11–20 (2013).
80. A. S. Abhilash, B. M. Baker, B. Trappmann, C. S. Chen, V. B. Shenoy, Remodeling of fibrous extracellular matrices by contractile cells: Predictions from discrete fiber network simulations. *Biophys. J.* **107**, 1829–1840 (2014).
81. P. Ronceray, C. P. Broedersz, M. Lenz, Fiber networks amplify active stress. *Proc. Natl. Acad. Sci. U.S.A.* **113**, 2827–2837 (2016).

82. X. Xu, S. A. Safran, Nonlinearities of biopolymer gels increase the range of force transmission. *Phys. Rev. E Stat. Nonlin. Soft Matter Phys.* **92**, 032728 (2015).
83. A. Kumar, D. A. Quint, K. Dasbiswas, Range and strength of mechanical interactions of force dipoles in elastic fiber networks. *Soft Matter* **19**, 5805–5823 (2023).
84. J. H. Levy, C. Greenberg, Biology of factor XIII and clinical manifestations of factor XIII deficiency. *Transfusion* **53**, 1120–1131 (2013).
85. O. V. Kim, Z. Xu, E. D. Rosen, M. S. Alber, Fibrin networks regulate protein transport during thrombus development. *PLOS Comput. Biol.* **9**, e1003095 (2013).
86. R. S. Voronov, T. J. Stalker, L. F. Brass, S. L. Diamond, Simulation of intrathrombus fluid and solute transport using in vivo clot structures with single platelet resolution. *Ann. Biomed. Eng.* **41**, 1297–1307 (2013).
87. A. V. Belyaev, M. A. Pantelev, F. I. Ataulakhanov, Threshold of microvascular occlusion: Injury size defines the thrombosis scenario. *Biophys. J.* **109**, 450–456 (2015).
88. V. Govindarajan, S. Zhu, R. Li, Y. Lu, S. L. Diamond, J. Reifman, A. Y. Mitrophanov, Impact of tissue factor localization on blood clot structure and resistance under venous shear. *Biophys. J.* **114**, 978–991 (2018).
89. Y. L. Han, P. Ronceray, G. Xu, A. Malandrino, R. D. Kamm, M. Lenz, C. P. Broedersz, M. Guo, Cell contraction induces long-ranged stress stiffening in the extracellular matrix. *Proc. Natl. Acad. Sci. U.S.A.* **115**, 4075–4080 (2018).
90. N. A. Kurniawan, T. H. S. van Kempen, S. Sonneveld, T. T. Rosalina, B. E. Vos, K. A. Jansen, G. W. M. Peters, F. N. van de Vosse, G. H. Koenderink, Buffers strongly modulate fibrin self-assembly into fibrous networks. *Langmuir* **33**, 6342–6352 (2017).
91. C. J. Jen, L. V. McIntire, The structural properties and contractile force of a clot. *Cell Motil.* **2**, 445–455 (1982).



92. G. Chaudhary, A. Ghosh, N. A. Bharadwaj, J. G. Kang, P. V. Braun, K. S. Schweizer, R. H. Ewoldt, Thermoresponsive stiffening with microgel particles in a semiflexible fibrin network. *Macromolecules* **52**, 3029–3041 (2019).
93. A. S. Caroline, S. R. Wayne, W. E. Kevin, NIH Image to ImageJ: 25 years of image analysis. *Nat. Methods* **9**, 671 (2012).
94. C. Geuzaine, J.-F. Remacle, Gmsh: A 3-D finite element mesh generator with built-in pre- and post-processing facilities. *Int. J. Numer. Methods Eng.* **79**, 1309–1331 (2009).
95. J. R. Houser, N. E. Hudson, L. Ping, E. T. O'Brien 3rd, R. Superfine, S. T. Lord, M. R. Falvo, Evidence that  $\alpha$ C region is origin of low modulus, high extensibility, and strain stiffening in fibrin fibers. *Biophys. J.* **99**, 3038–3047 (2010).
96. M. Guthold, W. Liu, E. A. Sparks, L. M. Jawerth, L. Peng, M. Falvo, R. Superfine, R. R. Hantgan, S. T. Lord, A comparison of the mechanical and structural properties of fibrin fibers with other protein fibers. *Cell Biochem. Biophys.* **49**, 165–181 (2007).
97. C. Steger, An unbiased detector of curvilinear structures. *IEEE Trans. Pattern Anal. Mach. Intell.* **20**, 113–125 (1998).
98. D. J. Barry, G. A. Williams, C. Chan, Automated analysis of filamentous microbial morphology with AnaMorf. *Biotechnol. Prog.* **31**, 849–852 (2015).
